# Supplementary material for: Enhanced Properties of Tailored Alumina–Magnesia-Based Dry Ramming Mixes by Calcium Magnesium Aluminate (CMA)
Source: MDPI journal article supplement (doi:10.3390/ma16041707), 2023-02-17
Supplement: s1 [file s1]

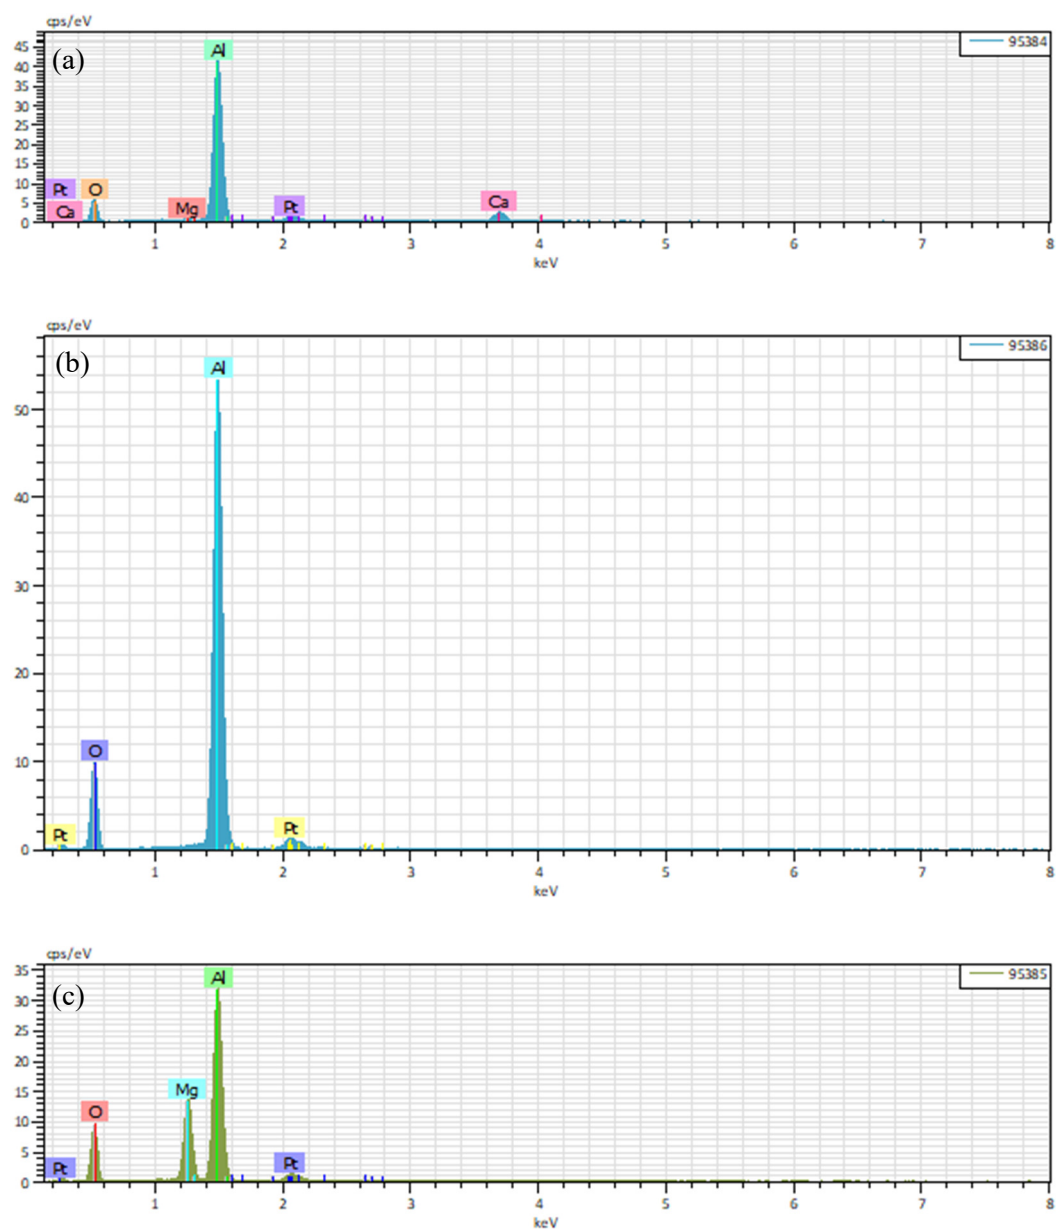

**Figure S1.** EDS spectra of point analysis for sample G4 in Fig. 5(e): (a) CA<sub>6</sub>, (b) Al<sub>2</sub>O<sub>3</sub>, and (c) spinel.

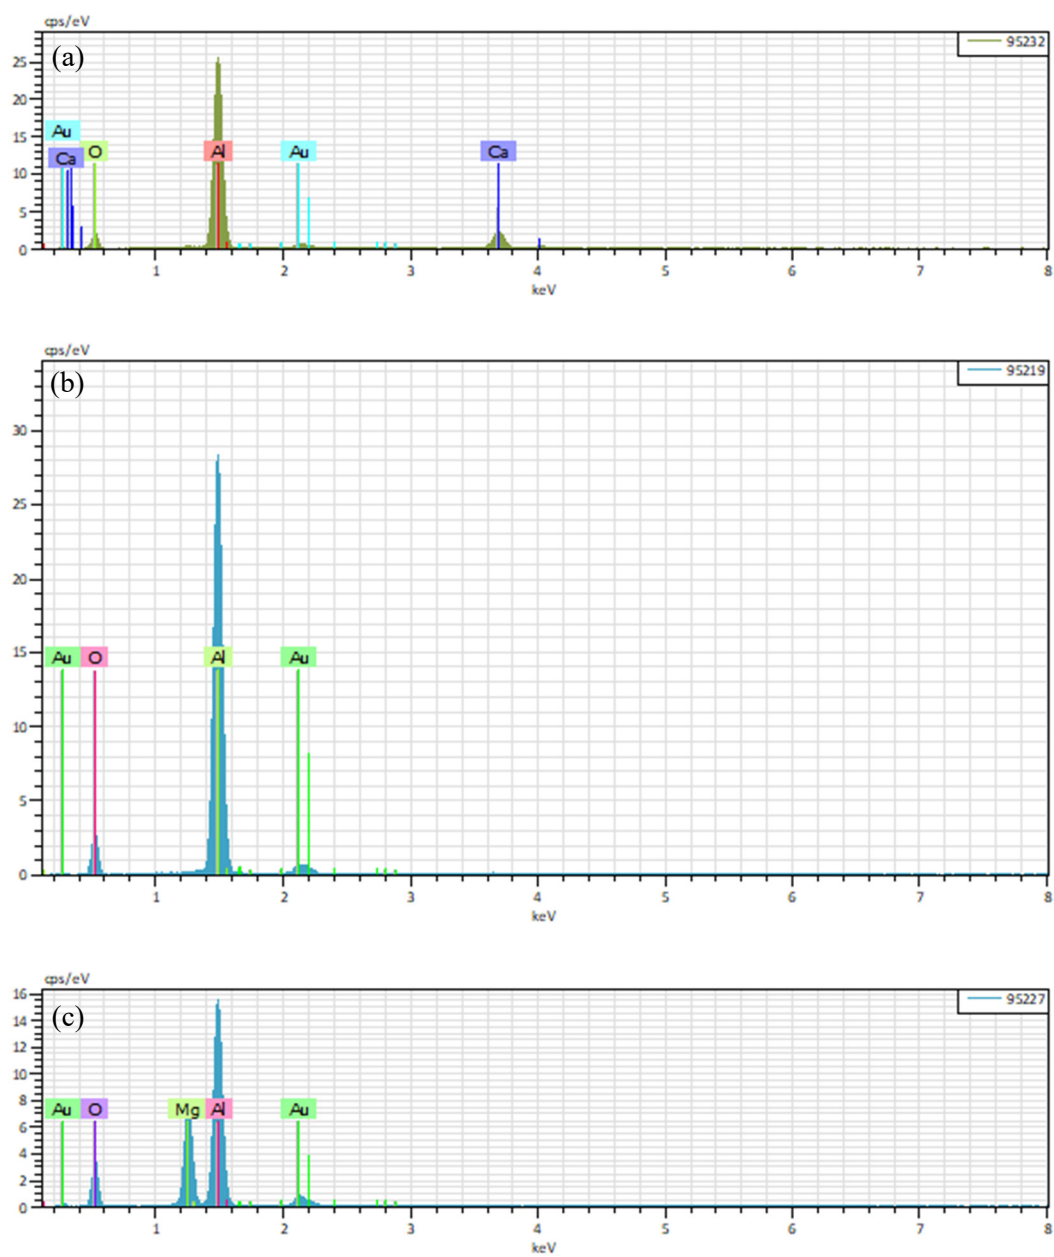

**Figure S2.** EDS spectra of point analysis for samples G8 in Fig. 5(f): (a)  $\text{CA}_6$ , (b)  $\text{Al}_2\text{O}_3$ , and (c) spinel.
